# Supplementary material for: Cellulose nanocrystalline and sodium benzenesulfonate-doped polypyrrole nano-hydrogel/Au composites for ultrasensitive detection of carcinoembryonic antigen
Source: Royal Society of Chemistry journal article supplement (doi:10.1039/d1nj00360g), 2021-01-01
Supplement: d1nj00360g1.pdf [file d1nj00360g1.pdf]

## Electronic Supplementary Information

### Cellulose nanocrystalline and sodium benzenesulfonate-doped polypyrrole nano-hydrogel/Au composites for ultrasensitive detection of carcinoembryonic antigen

Xiangrong Huang<sup>1</sup>, Zhuoyao Ni<sup>1</sup>, Haiping Su<sup>1</sup>, Yazhuo Shang<sup>\*1</sup>, Honglai Liu<sup>1</sup>, Yifan He<sup>2</sup>, Hong Meng<sup>2</sup>, Yinmao Dong<sup>2</sup>

*1 Key Laboratory for Advanced Materials, School of Chemistry & Molecular Engineering, East China University of Science and Technology, Shanghai 200237, China*

*2 Key Laboratory of Cosmetic, China National Light Industry, School of Science, Beijing Technology and Business University, Beijing 100048, China*

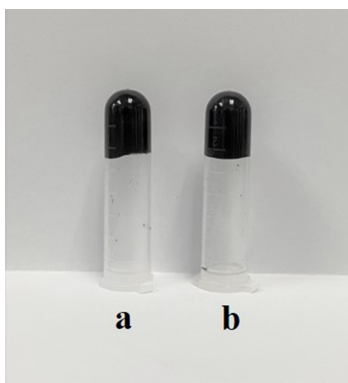

**Fig. S1** CNC-PPy gel (a) and BSNa-CNC-PPy gel (b) in centrifuge tubes.

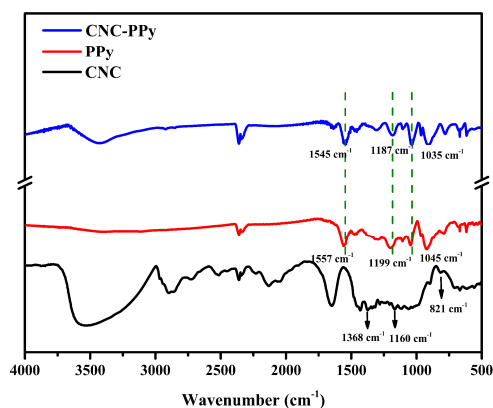

**Fig. S2** FTIR spectra of CNC, PPy and CNC-PPy.

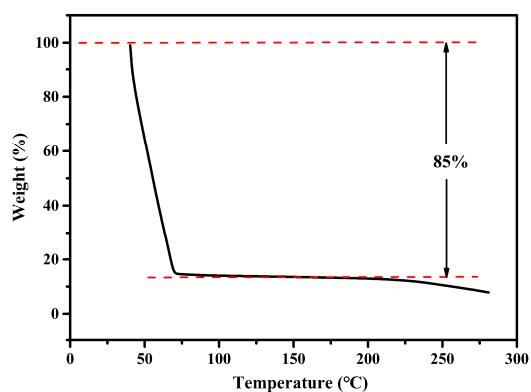

Fig. S3 Thermal gravimetric analysis of BSNa-CNC-PPy gel.

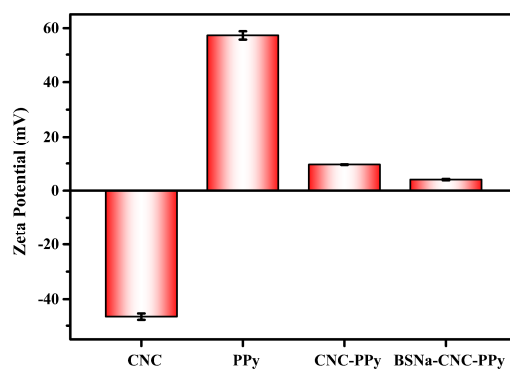

Fig. S4 Zeta potential of different samples.

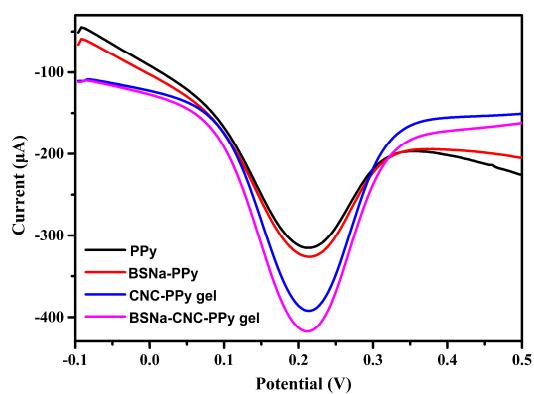

Fig. S5 Comparison of current response variation of GCE modified by different materials.

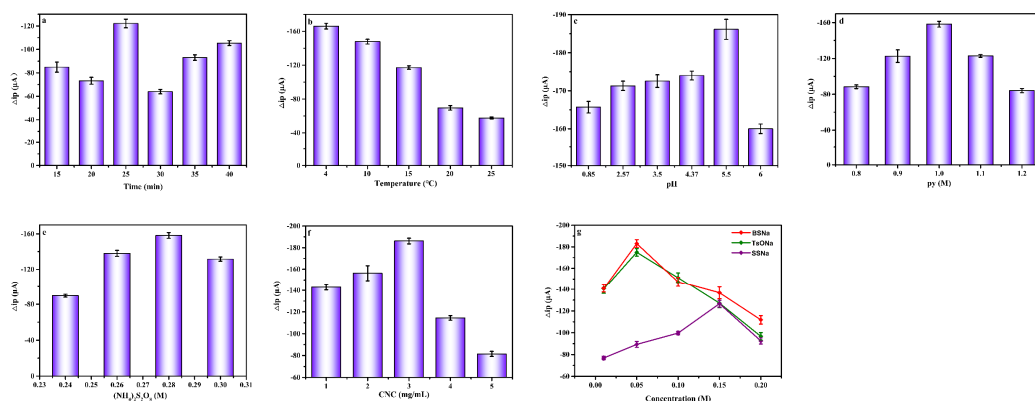

**Fig. S6** Effect of the reaction time (a); temperature (b); pH (c); concentration of py (d); concentration of  $(\text{NH}_4)_2\text{S}_2\text{O}_8$  (e);  $C_{\text{CNC}}$  (f) and sulphonate dopants (g) on the SWV responses for CNC-PPy modified immunosensor. (a) pH = 0.85,  $C_{\text{CNC}} = 2$  mg/mL,  $T = 4$  °C,  $C_{\text{py}} = 1$  M,  $C_{(\text{NH}_4)_2\text{S}_2\text{O}_8} = 0.25$  M; (b) pH = 0.85,  $C_{\text{CNC}} = 3$  mg/mL,  $t = 25$  min,  $C_{\text{py}} = 1$  M,  $C_{(\text{NH}_4)_2\text{S}_2\text{O}_8} = 0.28$  M; (c)  $C_{\text{CNC}} = 3$  mg/mL,  $T = 4$  °C,  $t = 25$  min,  $C_{\text{py}} = 1$  M,  $C_{(\text{NH}_4)_2\text{S}_2\text{O}_8} = 0.28$  M; (d) pH = 0.85,  $C_{\text{CNC}} = 3$  mg/mL,  $T = 4$  °C,  $t = 25$  min,  $C_{(\text{NH}_4)_2\text{S}_2\text{O}_8} = 0.28$  M; (e) pH = 0.85,  $C_{\text{CNC}} = 3$  mg/mL,  $T = 4$  °C,  $t = 25$  min,  $C_{\text{py}} = 1$  M; (f) pH = 5.5,  $C_{\text{CNC}} = 3$  mg/mL,  $T = 4$  °C,  $t = 25$  min,  $C_{\text{py}} = 1$  M,  $C_{(\text{NH}_4)_2\text{S}_2\text{O}_8} = 0.28$  M.

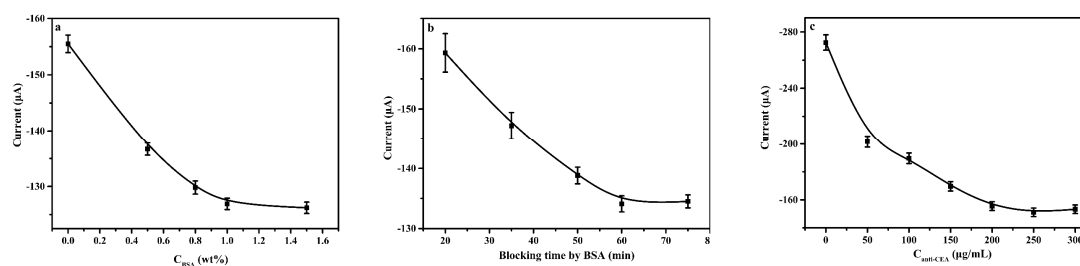

**Fig. S7** Effects of amounts of BSA (a), blocking time of BSA (b) and amounts of anti-CEA on the current responses of the developed immunosensor.

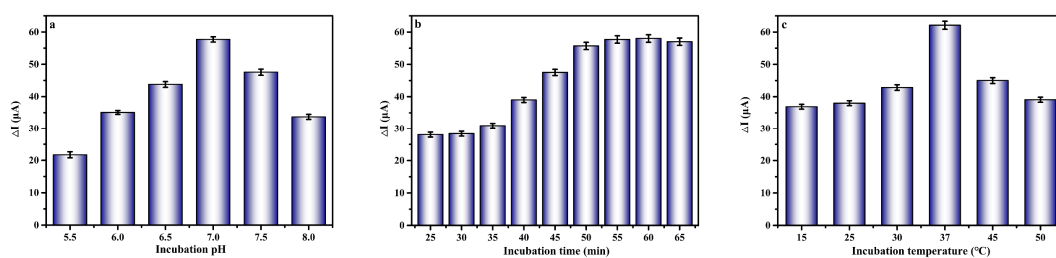

**Fig. S8** Effects of the incubation pH (a), incubation time (b) and incubation temperature (c) on the SWV responses of the immunosensor for  $50 \text{ ng} \cdot \text{mL}^{-1}$  CEA.

**Table. S1** Comparison of CNC-PPy gel and BSNa-CNC-PPy gel

| materials               | CNC-PPy gel                 | BSNa-CNC-PPy gel            | Ref                                                         |
|-------------------------|-----------------------------|-----------------------------|-------------------------------------------------------------|
| BET (m <sup>2</sup> /g) | 68.17                       | 76.59                       | 26.2 <sup>[1]</sup> 17.6 <sup>[2]</sup> 25.2 <sup>[3]</sup> |
| ECSA (mm <sup>2</sup> ) | 13.77/7.06 (bare)<br>= 1.95 | 15.15/7.06 (bare)<br>= 2.14 | 21.41/12.56 = 1.7 <sup>[4]</sup>                            |
| SWV response (μA)       | -256.4                      | -272.5                      |                                                             |
| Conductivity (S/cm)     | 1.62                        | 1.74                        | 0.46 <sup>[1]</sup>                                         |
| Reproducibility         | bad                         | good                        |                                                             |

**Table. S2** Comparison of linear range and detection limit of some modified electrodes materials

| Sensors                            | Linear range<br>(ng/mL)    | Detection limit (ng/mL) | Ref       |
|------------------------------------|----------------------------|-------------------------|-----------|
| PPy hydrogel/Au                    | 1.0×10 <sup>-6</sup> - 200 | 1.6 × 10 <sup>-7</sup>  | [1]       |
| GNP-THi-GR                         | 1×10 <sup>-2</sup> - 0.5   | 4 × 10 <sup>-3</sup>    | [5]       |
| AuNPs/(PB-rGO-MWCNTs) <sub>n</sub> | 2×10 <sup>-1</sup> - 40    | 6 × 10 <sup>-2</sup>    | [6]       |
| AuNPs/PB-PEDOT                     | 5×10 <sup>-2</sup> - 40    | 1 × 10 <sup>-2</sup>    | [7]       |
| AuNPs/CNOs/SWCTs/chitosan          | 1×10 <sup>-4</sup> - 400   | 1 × 10 <sup>-4</sup>    | [8]       |
| polyCBMA/PANI composite            | 1×10 <sup>-5</sup> - 0.1   | 3.05 × 10 <sup>-6</sup> | [9]       |
| BSNa-CNC-PPy hydrogel/Au           | 1.0×10 <sup>-6</sup> - 200 | 0.6 × 10 <sup>-7</sup>  | This work |

## References

- [1] Rong, Q., Han, H., Feng, F., Ma, Z. Network nanostructured polypyrrole hydrogel/Au composites as enhanced electrochemical biosensing platform. *Sci. Rep.* 2015, 5, 11440-11440.
- [2] Wang, H., Han, H., Ma, Z. Conductive hydrogel composed of 1,3,5-benzenetricarboxylic acid and Fe<sup>3+</sup> used as enhanced electrochemical immunosensing substrate for tumor biomarker. *Bioelectrochemistry.* 2017, 114, 48-53.
- [3] Wang, H., Ma, Z. Ultrasensitive amperometric detection of the tumor biomarker cytokeratin antigen using a hydrogel composite consisting of phytic acid, Pb(II) ions and gold nanoparticles. *Microchim. Acta.* 2017, 184, 1045-1050.

- [4] Zhao, L., Ma, Z. Facile synthesis of polyaniline-polythionine redox hydrogel: Conductive, antifouling and enzyme-linked material for ultrasensitive label-free amperometric immunosensor toward carcinoma antigen-125. *Anal. Chim. Acta.* 2018, 997, 60-66.
- [5] Kong, F., Xu, M., Xu, J., Chen, H. A novel label-free electrochemical immunosensor for carcinoembryonic antigen based on gold nanoparticles-thionine-reduced graphene oxide nanocomposite film modified glassy carbon electrode. *Talanta.* 2011, 85, 2620-2625.
- [6] Feng, D., Lu, X., Dong, X., Ling, Y., Zhang, Y. Label-free electrochemical immunosensor for the carcinoembryonic antigen using a glassy carbon electrode modified with electrodeposited Prussian Blue, a graphene and carbon nanotube assembly and an antibody immobilized on gold nanoparticles. *Microchim. Acta.* 2013, 180, 767-774.
- [7] Yang, T., Gao, Y., Liu, Z., Xu, J., Lu, L., Yu, Y. Three-dimensional gold nanoparticles/prussian blue-poly(3,4-ethylenedioxythiophene) nanocomposite as novel redox matrix for label-free electrochemical immunoassay of carcinoembryonic antigen. *Sens Actuators B Chem.* 2017, 239, 76-84.
- [8] Rizwan, M., Elma, S., Lim, S.A., Ahmed, M.U. AuNPs/CNOs/SWCNTs/chitosan-nanocomposite modified electrochemical sensor for the label-free detection of carcinoembryonic antigen. *Biosens. Bioelectron.* 2018, 107, 211-217.
- [9] Wang, J., Hui, N. Zwitterionic poly(carboxybetaine) functionalized conducting polymer polyaniline nanowires for the electrochemical detection of carcinoembryonic antigen in undiluted blood serum. *Bioelectrochemistry.* 2019, 125, 90-96.
